# Supplementary material for: A new perspective for evaluating the photoelectric performance of organic–inorganic hybrid perovskites based on the DFT calculations of excited states
Source: Royal Society of Chemistry journal article supplement (doi:10.1039/d1cp01000j), 2021-01-01
Supplement: d1cp01000j1.pdf [file d1cp01000j1.pdf]

*Supporting Information for*

**A new perspective for evaluating photoelectric performance of  
organic-inorganic hybrid perovskites based on DFT calculations of  
excited states**

Zhengyang Gao<sup>a</sup>, Shengyi Chen<sup>a</sup>, Yang Bai<sup>a</sup>, Min Wang<sup>a</sup>, Xiaoshuo Liu<sup>a,b</sup>, Weijie Yang<sup>\*a</sup>, Wei Li<sup>c</sup>, Xunlei Ding<sup>\*c</sup>,  
Jianxi Yao<sup>\*d,e</sup>

a Department of Power Engineering, School of Energy, Power and Mechanical Engineering, North China Electric  
Power University, Baoding 071003, China

b Key Laboratory of Energy Thermal Conversion and Control of Ministry of Education, School of Energy and  
Environment, Southeast University, Nanjing 210096, China

c Institute of Clusters and Low Dimensional Nanomaterials, School of Mathematics and Physics, North China  
Electric Power University, Beijing, People' s Republic of China

d State Key Laboratory of Alternate Electrical Power System with Renewable Energy Sources, North China Electric  
Power University, Beijing 102206, China.

e Beijing Key Laboratory of Energy Safety and Clean Utilization, North China Electric Power University, Beijing  
102206, China.

Table S1 Calculation results for the electron-hole distribution index from the ground state to the first singlet state,  $D$  index means the centroid distance between holes and electrons.  $Sr$  index means the overlap between holes and electrons.  $T$  index measures the degree of separation of holes and electrons.  $Ec$  and  $Es$  are exciton binding energy and excited energy respectively.  $Q$  is the amount of net charge transfer.  $G$  and  $S$  are the HOMO-LUMO gap and score index, respectively.

| Clusters            | $D$ (Å) | $Sr$ (a.u.) | $t$ (Å) | $Ec$ (eV) | $Es$ (eV) | $Q$ (e) | $G$ (eV) | $S$  |
|---------------------|---------|-------------|---------|-----------|-----------|---------|----------|------|
| FAGeCl <sub>3</sub> | 0.12    | 0.71        | -1.05   | 6.61      | 5.59      | 0.14    | 6.76     | 0.20 |
| FAGeBr <sub>3</sub> | 0.26    | 0.69        | -1.15   | 5.90      | 5.25      | 0.15    | 6.65     | 0.33 |
| FAGel <sub>3</sub>  | 0.37    | 0.67        | -1.16   | 5.48      | 4.08      | 0.28    | 6.30     | 0.67 |
| FASnCl <sub>3</sub> | 0.37    | 0.70        | -0.88   | 6.21      | 5.43      | 0.16    | 7.12     | 0.31 |
| FASnBr <sub>3</sub> | 0.71    | 0.60        | -0.91   | 5.21      | 4.86      | 0.33    | 6.94     | 0.75 |
| FASnl <sub>3</sub>  | 0.45    | 0.64        | -1.11   | 5.20      | 4.28      | 0.38    | 6.52     | 0.78 |
| FAPbCl <sub>3</sub> | 0.88    | 0.65        | -0.41   | 5.73      | 5.91      | 0.62    | 7.98     | 0.73 |
| FAPbBr <sub>3</sub> | 0.65    | 0.58        | -0.79   | 5.29      | 5.19      | 0.60    | 7.57     | 0.82 |
| FAPbl <sub>3</sub>  | 0.93    | 0.61        | -0.56   | 4.93      | 4.44      | 0.57    | 6.77     | 1.22 |
| JAGeCl <sub>3</sub> | 0.17    | 0.70        | -1.03   | 6.73      | 5.52      | 0.13    | 6.85     | 0.20 |
| JAGeBr <sub>3</sub> | 0.40    | 0.65        | -0.90   | 6.17      | 4.93      | 0.16    | 6.50     | 0.41 |
| JAGel <sub>3</sub>  | 0.68    | 0.62        | -0.86   | 5.23      | 4.03      | 0.41    | 6.08     | 1.00 |
| JASnCl <sub>3</sub> | 1.01    | 0.60        | -0.84   | 5.54      | 5.31      | 0.42    | 7.15     | 0.38 |
| JASnBr <sub>3</sub> | 0.25    | 0.70        | -1.29   | 5.12      | 5.29      | 0.32    | 6.78     | 0.42 |
| JASnl <sub>3</sub>  | 0.52    | 0.61        | -1.06   | 5.09      | 4.20      | 0.48    | 6.31     | 0.93 |
| JAPbCl <sub>3</sub> | 0.33    | 0.55        | -0.97   | 5.63      | 5.63      | 0.67    | 7.97     | 0.59 |
| JAPbBr <sub>3</sub> | 0.47    | 0.54        | -0.99   | 5.27      | 5.12      | 0.66    | 7.43     | 0.79 |
| JAPbl <sub>3</sub>  | 0.82    | 0.58        | -0.76   | 4.95      | 4.42      | 0.60    | 6.71     | 1.15 |
| MAGeCl <sub>3</sub> | 0.10    | 0.74        | -1.17   | 6.64      | 5.78      | 0.35    | 8.30     | 0.16 |
| MAGeBr <sub>3</sub> | 0.22    | 0.69        | -1.10   | 6.08      | 5.20      | 0.20    | 7.84     | 0.27 |
| MAGel <sub>3</sub>  | 0.02    | 0.70        | -1.35   | 5.56      | 4.21      | 0.22    | 6.68     | 0.44 |
| MASnCl <sub>3</sub> | 0.33    | 0.71        | -0.99   | 6.28      | 5.52      | 0.37    | 8.23     | 0.32 |
| MASnBr <sub>3</sub> | 0.39    | 0.73        | -1.00   | 5.88      | 5.11      | 0.41    | 7.76     | 0.47 |
| MASnl <sub>3</sub>  | 0.15    | 0.70        | -1.36   | 5.28      | 4.50      | 0.29    | 6.88     | 0.53 |
| MAPbCl <sub>3</sub> | 0.87    | 0.67        | -0.41   | 5.78      | 6.01      | 0.61    | 8.69     | 0.66 |
| MAPbBr <sub>3</sub> | 0.96    | 0.71        | -0.35   | 5.43      | 5.49      | 0.66    | 7.97     | 0.90 |
| MAPbl <sub>3</sub>  | 1.18    | 0.42        | 0.07    | 4.88      | 4.57      | 0.75    | 6.95     | 1.83 |
| EAGeCl <sub>3</sub> | 0.12    | 0.71        | -1.01   | 6.59      | 5.50      | 0.38    | 7.80     | 0.24 |
| EAGeBr <sub>3</sub> | 0.30    | 0.67        | -0.96   | 6.09      | 4.93      | 0.13    | 7.57     | 0.32 |
| EAGel <sub>3</sub>  | 0.40    | 0.67        | -1.04   | 5.51      | 4.05      | 0.16    | 6.55     | 0.58 |
| EASnCl <sub>3</sub> | 0.31    | 0.69        | -0.96   | 6.24      | 5.28      | 0.16    | 8.02     | 0.29 |
| EASnBr <sub>3</sub> | 0.42    | 0.69        | -0.90   | 5.82      | 4.88      | 0.21    | 7.55     | 0.47 |
| EASnl <sub>3</sub>  | 0.52    | 0.66        | -0.94   | 5.28      | 4.26      | 0.21    | 6.69     | 0.72 |
| EAPbCl <sub>3</sub> | 0.89    | 0.61        | -0.40   | 5.81      | 5.74      | 0.37    | 8.43     | 0.69 |
| EAPbBr <sub>3</sub> | 1.06    | 0.59        | -0.36   | 5.42      | 5.15      | 0.39    | 7.67     | 0.99 |
| EAPbl <sub>3</sub>  | 1.21    | 0.59        | -0.28   | 4.97      | 4.35      | 0.41    | 6.71     | 1.41 |
| BAGeCl <sub>3</sub> | 0.11    | 0.73        | -1.12   | 6.64      | 5.70      | 0.13    | 8.44     | 0.15 |
| BAGeBr <sub>3</sub> | 0.37    | 0.67        | -0.97   | 6.13      | 5.16      | 0.15    | 7.85     | 0.34 |
| BAGel <sub>3</sub>  | 0.23    | 0.70        | -1.28   | 5.53      | 4.24      | 0.13    | 6.73     | 0.45 |
| BASnCl <sub>3</sub> | 0.27    | 0.72        | -1.10   | 6.29      | 5.49      | 0.16    | 8.20     | 0.25 |
| BASnBr <sub>3</sub> | 0.44    | 0.70        | -0.89   | 5.86      | 5.05      | 0.21    | 7.72     | 0.46 |
| BASnl <sub>3</sub>  | 0.56    | 0.66        | -0.95   | 5.35      | 4.47      | 0.22    | 6.95     | 0.69 |
| BAPbCl <sub>3</sub> | 0.82    | 0.66        | -0.53   | 5.82      | 6.00      | 0.37    | 8.68     | 0.60 |
| BAPbBr <sub>3</sub> | 0.97    | 0.65        | -0.43   | 5.47      | 5.44      | 0.41    | 8.02     | 0.86 |
| BAPbl <sub>3</sub>  | 1.35    | 0.48        | 0.12    | 4.85      | 4.63      | 0.59    | 7.00     | 1.80 |
| DAGeCl <sub>3</sub> | 0.27    | 0.69        | -1.14   | 6.19      | 5.51      | 0.16    | 7.17     | 0.22 |
| DAGeBr <sub>3</sub> | 0.38    | 0.65        | -0.95   | 5.96      | 4.95      | 0.15    | 7.07     | 0.37 |
| DAGel <sub>3</sub>  | 0.29    | 0.68        | -1.19   | 5.44      | 4.08      | 0.16    | 6.55     | 0.54 |
| DASnCl <sub>3</sub> | 0.25    | 0.69        | -1.15   | 6.04      | 5.30      | 0.17    | 7.49     | 0.29 |
| DASnBr <sub>3</sub> | 0.36    | 0.68        | -1.05   | 5.69      | 4.91      | 0.20    | 7.32     | 0.45 |
| DASnl <sub>3</sub>  | 0.48    | 0.64        | -1.02   | 5.19      | 4.30      | 0.20    | 6.70     | 0.70 |
| DAPbCl <sub>3</sub> | 0.83    | 0.59        | -0.58   | 5.62      | 5.75      | 0.37    | 8.29     | 0.67 |
| DAPbBr <sub>3</sub> | 0.92    | 0.59        | -0.56   | 5.28      | 5.17      | 0.39    | 7.66     | 0.90 |
| DAPbl <sub>3</sub>  | 1.00    | 0.61        | -0.58   | 4.91      | 4.40      | 0.41    | 6.73     | 1.20 |
| KBGeCl <sub>3</sub> | 0.12    | 0.72        | -1.10   | 6.55      | 5.68      | 0.13    | 8.16     | 0.09 |
| KBGeBr <sub>3</sub> | 0.38    | 0.66        | -0.96   | 6.00      | 5.15      | 0.14    | 7.80     | 0.28 |
| KBGel <sub>3</sub>  | 0.12    | 0.70        | -1.33   | 5.49      | 4.19      | 0.14    | 6.67     | 0.39 |
| KBSnCl <sub>3</sub> | 0.30    | 0.70        | -1.02   | 6.18      | 5.37      | 0.16    | 8.09     | 0.22 |
| KBSnBr <sub>3</sub> | 0.40    | 0.70        | -0.99   | 5.74      | 5.03      | 0.21    | 7.67     | 0.38 |
| KBSnl <sub>3</sub>  | 0.55    | 0.66        | -0.84   | 5.27      | 4.46      | 0.22    | 6.87     | 0.67 |
| KBPbCl <sub>3</sub> | 0.86    | 0.63        | -0.47   | 5.72      | 5.85      | 0.37    | 8.52     | 0.56 |
| KBPbBr <sub>3</sub> | 1.00    | 0.61        | -0.40   | 5.34      | 5.32      | 0.39    | 7.81     | 0.84 |
| KBPbl <sub>3</sub>  | 1.32    | 0.44        | -0.23   | 4.83      | 4.60      | 0.61    | 6.94     | 1.57 |
| KCGeCl <sub>3</sub> | 0.09    | 0.72        | -1.17   | 6.46      | 5.58      | 0.13    | 7.90     | 0.04 |
| KCGeBr <sub>3</sub> | 0.39    | 0.66        | -0.96   | 6.03      | 5.14      | 0.15    | 7.79     | 0.22 |
| KCGel <sub>3</sub>  | 0.14    | 0.70        | -1.31   | 5.48      | 4.19      | 0.14    | 6.66     | 0.35 |
| KCSnCl <sub>3</sub> | 0.28    | 0.70        | -1.04   | 6.12      | 5.36      | 0.16    | 8.07     | 0.17 |
| KCSnBr <sub>3</sub> | 0.40    | 0.70        | -0.99   | 5.74      | 5.03      | 0.21    | 7.67     | 0.32 |
| KCSnl <sub>3</sub>  | 0.52    | 0.65        | -0.87   | 5.28      | 4.46      | 0.21    | 6.87     | 0.59 |
| KCPbCl <sub>3</sub> | 0.87    | 0.63        | -0.47   | 5.71      | 5.84      | 0.37    | 8.51     | 0.49 |
| KCPbBr <sub>3</sub> | 1.01    | 0.60        | -0.42   | 5.33      | 5.31      | 0.39    | 7.80     | 0.76 |

|                     |      |      |       |      |      |      |      |      |
|---------------------|------|------|-------|------|------|------|------|------|
| KCPbI <sub>3</sub>  | 1.15 | 0.62 | -0.43 | 4.94 | 4.49 | 0.41 | 6.82 | 1.12 |
| RAGeCl <sub>3</sub> | 0.18 | 0.73 | -1.11 | 6.27 | 5.62 | 0.15 | 6.91 | 0.19 |
| RAGeBr <sub>3</sub> | 0.20 | 0.69 | -1.15 | 5.97 | 5.00 | 0.16 | 6.77 | 0.31 |
| RAGeI <sub>3</sub>  | 0.17 | 0.67 | -1.30 | 5.37 | 4.06 | 0.18 | 6.38 | 0.55 |
| RASnCl <sub>3</sub> | 0.28 | 0.70 | -1.03 | 6.11 | 5.41 | 0.16 | 7.24 | 0.29 |
| RASnBr <sub>3</sub> | 0.19 | 0.68 | -1.43 | 5.42 | 4.95 | 0.32 | 7.03 | 0.46 |
| RASnI <sub>3</sub>  | 0.20 | 0.66 | -1.30 | 5.17 | 4.30 | 0.22 | 6.56 | 0.61 |
| RAPbCl <sub>3</sub> | 0.48 | 0.62 | -1.01 | 5.60 | 5.78 | 0.40 | 8.08 | 0.49 |
| RAPbBr <sub>3</sub> | 0.48 | 0.60 | -1.09 | 5.26 | 5.18 | 0.43 | 7.56 | 0.67 |
| RAPbI <sub>3</sub>  | 0.74 | 0.62 | -0.89 | 4.93 | 4.40 | 0.42 | 6.70 | 1.02 |
| TAGeCl <sub>3</sub> | 0.12 | 0.72 | -1.14 | 6.51 | 5.68 | 0.12 | 8.22 | 0.11 |
| TAGeBr <sub>3</sub> | 0.37 | 0.66 | -0.97 | 5.98 | 5.14 | 0.13 | 7.79 | 0.30 |
| TAGeI <sub>3</sub>  | 0.12 | 0.70 | -1.33 | 5.49 | 4.20 | 0.13 | 6.67 | 0.40 |
| TASnCl <sub>3</sub> | 0.30 | 0.71 | -1.09 | 6.17 | 5.45 | 0.16 | 8.15 | 0.23 |
| TASnBr <sub>3</sub> | 0.40 | 0.71 | -1.06 | 5.75 | 5.05 | 0.20 | 7.69 | 0.38 |
| TASnI <sub>3</sub>  | 0.47 | 0.66 | -0.94 | 5.24 | 4.47 | 0.19 | 6.86 | 0.63 |
| TAPbCl <sub>3</sub> | 0.84 | 0.65 | -0.56 | 5.70 | 5.94 | 0.37 | 8.59 | 0.55 |
| TAPbBr <sub>3</sub> | 0.93 | 0.64 | -0.57 | 5.37 | 5.42 | 0.40 | 7.92 | 0.75 |
| TAPbI <sub>3</sub>  | 1.24 | 0.44 | -0.29 | 4.81 | 4.58 | 0.60 | 6.93 | 1.57 |
| UAGeCl <sub>3</sub> | 0.09 | 0.73 | -1.22 | 6.47 | 5.71 | 0.13 | 8.44 | 0.11 |
| UAGeBr <sub>3</sub> | 0.22 | 0.73 | -1.12 | 5.98 | 5.21 | 0.18 | 7.88 | 0.24 |
| UAGeI <sub>3</sub>  | 0.07 | 0.69 | -1.31 | 5.50 | 4.24 | 0.13 | 6.70 | 0.40 |
| UASnCl <sub>3</sub> | 0.33 | 0.71 | -1.03 | 6.18 | 5.46 | 0.16 | 8.14 | 0.24 |
| UASnBr <sub>3</sub> | 0.42 | 0.72 | -1.02 | 5.74 | 5.06 | 0.21 | 7.69 | 0.39 |
| UASnI <sub>3</sub>  | 0.47 | 0.73 | -1.04 | 5.26 | 4.50 | 0.23 | 6.91 | 0.59 |
| UAPbCl <sub>3</sub> | 0.92 | 0.67 | -0.40 | 5.69 | 5.92 | 0.39 | 8.58 | 0.62 |
| UAPbBr <sub>3</sub> | 0.98 | 0.69 | -0.37 | 5.36 | 5.42 | 0.43 | 7.98 | 0.82 |
| UAPbI <sub>3</sub>  | 1.28 | 0.43 | -0.21 | 4.80 | 4.62 | 0.61 | 6.97 | 1.63 |

Table S2 Effective radii of molecular cations and anions and the tolerance factor (TF) of perovskites. Ionic radii of FA, MA, EA, BA, DA, and RA were used according to ref. 1. Ionic radii of TA and UA were used according to ref. 2. Ionic radii of JA, KB, KC was estimated because the large A makes the three-dimensional structure of the perovskite change to the two-dimensional structure<sup>4-6</sup>. Ionic radii of B and X were used according to ref. 3. TFs in the range of 0.78-1.05 have been bolded.

| Clusters            | $r_A$ (Å) | $r_B$ (Å) | $r_X$ (Å) | TF          | Clusters            | $r_A$ (Å) | $r_B$ (Å) | $r_X$ (Å) | TF          |
|---------------------|-----------|-----------|-----------|-------------|---------------------|-----------|-----------|-----------|-------------|
| FAGeCl <sub>3</sub> | 2.53      | 1.2       | 1.02      | 1.13        | DASnBr <sub>3</sub> | 2.92      | 1.39      | 1.2       | 1.12        |
| FAGeBr <sub>3</sub> | 2.53      | 1.2       | 1.2       | 1.10        | DASnI <sub>3</sub>  | 2.92      | 1.39      | 1.39      | 1.10        |
| FAGeI <sub>3</sub>  | 2.53      | 1.2       | 1.39      | 1.07        | DAPbCl <sub>3</sub> | 2.92      | 1.46      | 1.02      | 1.12        |
| FASnCl <sub>3</sub> | 2.53      | 1.39      | 1.02      | <b>1.04</b> | DAPbBr <sub>3</sub> | 2.92      | 1.46      | 1.2       | 1.10        |
| FASnBr <sub>3</sub> | 2.53      | 1.39      | 1.2       | <b>1.02</b> | DAPbI <sub>3</sub>  | 2.92      | 1.46      | 1.39      | 1.07        |
| FASnI <sub>3</sub>  | 2.53      | 1.39      | 1.39      | <b>1.00</b> | KBGeCl <sub>3</sub> | 3.31      | 1.2       | 1.02      | 1.38        |
| FAPbCl <sub>3</sub> | 2.53      | 1.46      | 1.02      | <b>1.01</b> | KBGeBr <sub>3</sub> | 3.31      | 1.2       | 1.2       | 1.33        |
| FAPbBr <sub>3</sub> | 2.53      | 1.46      | 1.2       | <b>0.99</b> | KBGeI <sub>3</sub>  | 3.31      | 1.2       | 1.39      | 1.28        |
| FAPbI <sub>3</sub>  | 2.53      | 1.46      | 1.39      | <b>0.97</b> | KBSnCl <sub>3</sub> | 3.31      | 1.39      | 1.02      | 1.27        |
| JAGeCl <sub>3</sub> | 2.73      | 1.2       | 1.02      | 1.19        | KBSnBr <sub>3</sub> | 3.31      | 1.39      | 1.2       | 1.23        |
| JAGeBr <sub>3</sub> | 2.73      | 1.2       | 1.2       | 1.16        | KBSnI <sub>3</sub>  | 3.31      | 1.39      | 1.39      | 1.20        |
| JAGeI <sub>3</sub>  | 2.73      | 1.2       | 1.39      | 1.12        | KBPbCl <sub>3</sub> | 3.31      | 1.46      | 1.02      | 1.23        |
| JASnCl <sub>3</sub> | 2.73      | 1.39      | 1.02      | 1.10        | KBPbBr <sub>3</sub> | 3.31      | 1.46      | 1.2       | 1.20        |
| JASnBr <sub>3</sub> | 2.73      | 1.39      | 1.2       | 1.07        | KBPbI <sub>3</sub>  | 3.31      | 1.46      | 1.39      | 1.17        |
| JASnI <sub>3</sub>  | 2.73      | 1.39      | 1.39      | <b>1.05</b> | KCGeCl <sub>3</sub> | 3.88      | 1.2       | 1.02      | 1.56        |
| JAPbCl <sub>3</sub> | 2.73      | 1.46      | 1.02      | <b>1.07</b> | KCGeBr <sub>3</sub> | 3.88      | 1.2       | 1.2       | 1.50        |
| JAPbBr <sub>3</sub> | 2.73      | 1.46      | 1.2       | <b>1.04</b> | KCGeI <sub>3</sub>  | 3.88      | 1.2       | 1.39      | 1.44        |
| JAPbI <sub>3</sub>  | 2.73      | 1.46      | 1.39      | <b>1.02</b> | KCSnCl <sub>3</sub> | 3.88      | 1.39      | 1.02      | 1.44        |
| MAGeCl <sub>3</sub> | 2.17      | 1.2       | 1.02      | <b>1.02</b> | KCSnBr <sub>3</sub> | 3.88      | 1.39      | 1.2       | 1.39        |
| MAGeBr <sub>3</sub> | 2.17      | 1.2       | 1.2       | <b>0.99</b> | KCSnI <sub>3</sub>  | 3.88      | 1.39      | 1.39      | 1.34        |
| MAGeI <sub>3</sub>  | 2.17      | 1.2       | 1.39      | <b>0.97</b> | KCPbCl <sub>3</sub> | 3.88      | 1.46      | 1.02      | 1.40        |
| MASnCl <sub>3</sub> | 2.17      | 1.39      | 1.02      | <b>0.94</b> | KCPbBr <sub>3</sub> | 3.88      | 1.46      | 1.2       | 1.35        |
| MASnBr <sub>3</sub> | 2.17      | 1.39      | 1.2       | <b>0.92</b> | KCPbI <sub>3</sub>  | 3.88      | 1.46      | 1.39      | 1.31        |
| MASnI <sub>3</sub>  | 2.17      | 1.39      | 1.39      | <b>0.91</b> | RAGeCl <sub>3</sub> | 2.58      | 1.2       | 1.02      | 1.15        |
| MAPbCl <sub>3</sub> | 2.17      | 1.46      | 1.02      | <b>0.91</b> | RAGeBr <sub>3</sub> | 2.58      | 1.2       | 1.2       | 1.11        |
| MAPbBr <sub>3</sub> | 2.17      | 1.46      | 1.2       | <b>0.90</b> | RAGeI <sub>3</sub>  | 2.58      | 1.2       | 1.39      | 1.08        |
| MAPbI <sub>3</sub>  | 2.17      | 1.46      | 1.39      | <b>0.88</b> | RASnCl <sub>3</sub> | 2.58      | 1.39      | 1.02      | 1.06        |
| EAGeCl <sub>3</sub> | 2.74      | 1.2       | 1.02      | 1.20        | RASnBr <sub>3</sub> | 2.58      | 1.39      | 1.2       | <b>1.03</b> |
| EAGeBr <sub>3</sub> | 2.74      | 1.2       | 1.2       | 1.16        | RASnI <sub>3</sub>  | 2.58      | 1.39      | 1.39      | <b>1.01</b> |
| EAGeI <sub>3</sub>  | 2.74      | 1.2       | 1.39      | 1.13        | RAPbCl <sub>3</sub> | 2.58      | 1.46      | 1.02      | <b>1.03</b> |
| EASnCl <sub>3</sub> | 2.74      | 1.39      | 1.02      | 1.10        | RAPbBr <sub>3</sub> | 2.58      | 1.46      | 1.2       | <b>1.00</b> |
| EASnBr <sub>3</sub> | 2.74      | 1.39      | 1.2       | 1.08        | RAPbI <sub>3</sub>  | 2.58      | 1.46      | 1.39      | <b>0.98</b> |
| EASnI <sub>3</sub>  | 2.74      | 1.39      | 1.39      | <b>1.05</b> | TAGeCl <sub>3</sub> | 3.07      | 1.2       | 1.02      | 1.30        |
| EAPbCl <sub>3</sub> | 2.74      | 1.46      | 1.02      | 1.07        | TAGeBr <sub>3</sub> | 3.07      | 1.2       | 1.2       | 1.26        |
| EAPbBr <sub>3</sub> | 2.74      | 1.46      | 1.2       | <b>1.05</b> | TAGeI <sub>3</sub>  | 3.07      | 1.2       | 1.39      | 1.22        |
| EAPbI <sub>3</sub>  | 2.74      | 1.46      | 1.39      | <b>1.02</b> | TASnCl <sub>3</sub> | 3.07      | 1.39      | 1.02      | 1.20        |
| BAGeCl <sub>3</sub> | 2.16      | 1.2       | 1.02      | <b>1.01</b> | TASnBr <sub>3</sub> | 3.07      | 1.39      | 1.2       | 1.17        |
| BAGeBr <sub>3</sub> | 2.16      | 1.2       | 1.2       | <b>0.99</b> | TASnI <sub>3</sub>  | 3.07      | 1.39      | 1.39      | 1.13        |
| BAGeI <sub>3</sub>  | 2.16      | 1.2       | 1.39      | <b>0.97</b> | TAPbCl <sub>3</sub> | 3.07      | 1.46      | 1.02      | 1.17        |
| BASnCl <sub>3</sub> | 2.16      | 1.39      | 1.02      | <b>0.93</b> | TAPbBr <sub>3</sub> | 3.07      | 1.46      | 1.2       | 1.14        |
| BASnBr <sub>3</sub> | 2.16      | 1.39      | 1.2       | <b>0.92</b> | TAPbI <sub>3</sub>  | 3.07      | 1.46      | 1.39      | 1.11        |
| BASnI <sub>3</sub>  | 2.16      | 1.39      | 1.39      | <b>0.90</b> | UAGeCl <sub>3</sub> | 3.04      | 1.2       | 1.02      | 1.29        |
| BAPbCl <sub>3</sub> | 2.16      | 1.46      | 1.02      | <b>0.91</b> | UAGeBr <sub>3</sub> | 3.04      | 1.2       | 1.2       | 1.25        |
| BAPbBr <sub>3</sub> | 2.16      | 1.46      | 1.2       | <b>0.89</b> | UAGeI <sub>3</sub>  | 3.04      | 1.2       | 1.39      | 1.21        |
| BAPbI <sub>3</sub>  | 2.16      | 1.46      | 1.39      | <b>0.88</b> | UASnCl <sub>3</sub> | 3.04      | 1.39      | 1.02      | 1.19        |
| DAGeCl <sub>3</sub> | 2.92      | 1.2       | 1.02      | 1.25        | UASnBr <sub>3</sub> | 3.04      | 1.39      | 1.2       | 1.16        |
| DAGeBr <sub>3</sub> | 2.92      | 1.2       | 1.2       | 1.21        | UASnI <sub>3</sub>  | 3.04      | 1.39      | 1.39      | 1.13        |
| DAGeI <sub>3</sub>  | 2.92      | 1.2       | 1.39      | 1.18        | UAPbCl <sub>3</sub> | 3.04      | 1.46      | 1.02      | 1.16        |
| DASnCl <sub>3</sub> | 2.92      | 1.39      | 1.02      | 1.16        | UAPbBr <sub>3</sub> | 3.04      | 1.46      | 1.2       | 1.13        |
| DASnBr <sub>3</sub> | 2.92      | 1.39      | 1.2       | 1.12        | UAPbI <sub>3</sub>  | 3.04      | 1.46      | 1.39      | 1.10        |

Table S3 The binding energy table which is calculated by the formula  $\Delta E = E_{ABX_3} - E_A - E_{BX_3}$ . M06-2X-D3, M06-2X, B3LYP-D3, and B3LYP are the testing functionals. Error is the difference between the binding energy calculated by other functionals and M06-2X-D3. (all energies are in eV) Time is job cpu time which is exported by Gaussian 09.

| Cluster             | M06-2X-D3      |       |              | M06-2X         |       |              |
|---------------------|----------------|-------|--------------|----------------|-------|--------------|
|                     | Binding energy | Error | Time (hours) | Binding energy | Error | Time (hours) |
| MAPbF <sub>3</sub>  | 5.886          | 0.000 | 0.640        | 5.881          | 0.005 | 0.628        |
| MAPbCl <sub>3</sub> | 4.989          | 0.000 | 0.602        | 4.982          | 0.007 | 0.559        |
| MAPbBr <sub>3</sub> | 4.770          | 0.000 | 0.871        | 4.763          | 0.007 | 0.992        |
| MAPbI <sub>3</sub>  | 4.524          | 0.000 | 1.003        | 4.518          | 0.007 | 1.064        |
| Cluster             | B3LYP-D3       |       |              | B3LYP          |       |              |
|                     | Binding energy | Error | Time (hours) | Binding energy | Error | Time (hours) |
| MAPbF <sub>3</sub>  | 5.866          | 0.020 | 0.444        | 5.684          | 0.201 | 0.402        |
| MAPbCl <sub>3</sub> | 5.100          | 0.112 | 0.381        | 4.819          | 0.169 | 0.373        |
| MAPbBr <sub>3</sub> | 4.888          | 0.118 | 0.710        | 4.579          | 0.191 | 0.606        |
| MAPbI <sub>3</sub>  | 4.673          | 0.149 | 0.732        | 4.327          | 0.198 | 0.792        |

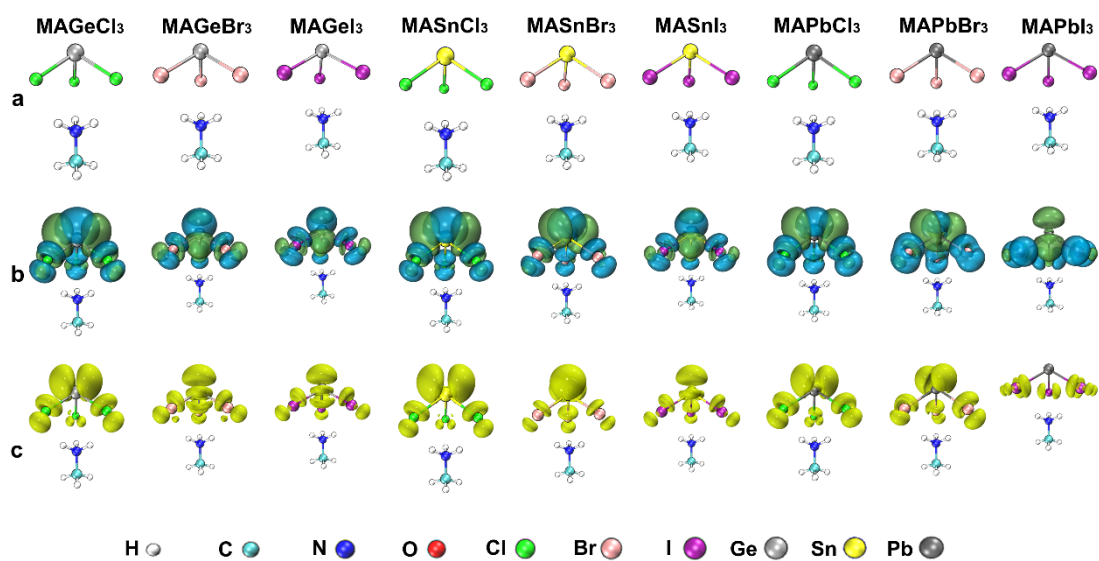

Figure S1. a) Optimized structures of  $MABX_3$  ( $B = Ge^{2+}, Sn^{2+}, Pb^{2+}$ , and  $X = Cl^-, Br^-, I^-$ ). b) The electron-hole distribution chart. Green and blue isosurfaces represent the distribution of electrons and holes, respectively. c) The  $\rho(r)$  distribution charts. The yellow isosurface represents the overlap of electrons and holes. The isosurfaces were uniformly selected as 0.002, respectively.

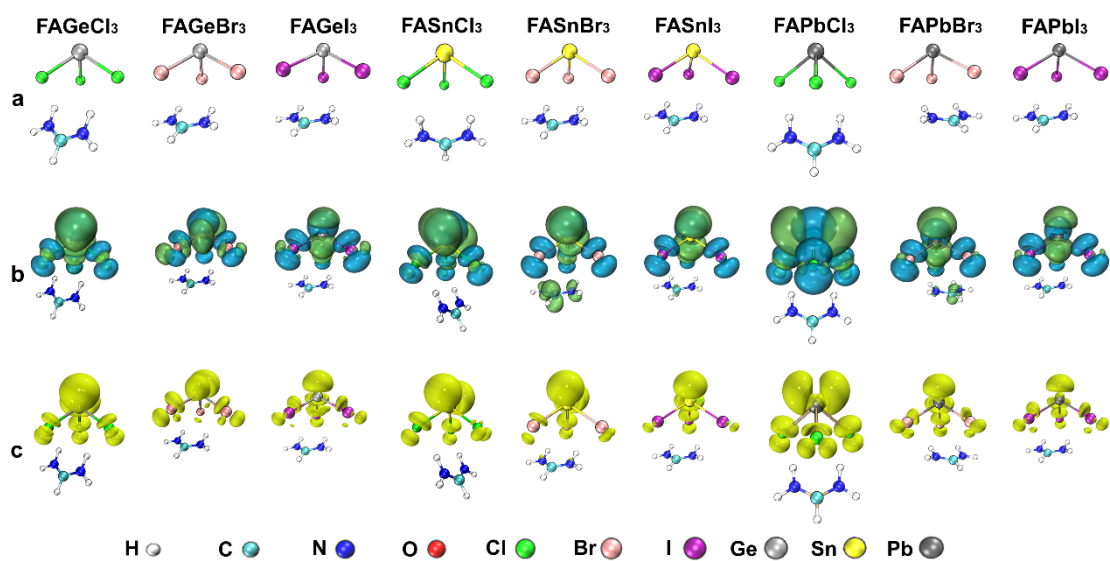

Figure S2. a) Optimized structures of  $\text{FABX}_3$  ( $\text{B} = \text{Ge}^{2+}$ ,  $\text{Sn}^{2+}$ ,  $\text{Pb}^{2+}$ , and  $\text{X} = \text{Cl}^-$ ,  $\text{Br}^-$ ,  $\text{I}^-$ ). b) The electron-hole distribution chart. Green and blue isosurfaces represent the distribution of electrons and holes, respectively. c) The  $s(r)$  distribution charts. The yellow isosurface represents the overlap of electrons and holes. The isosurfaces were uniformly selected as 0.002, respectively.

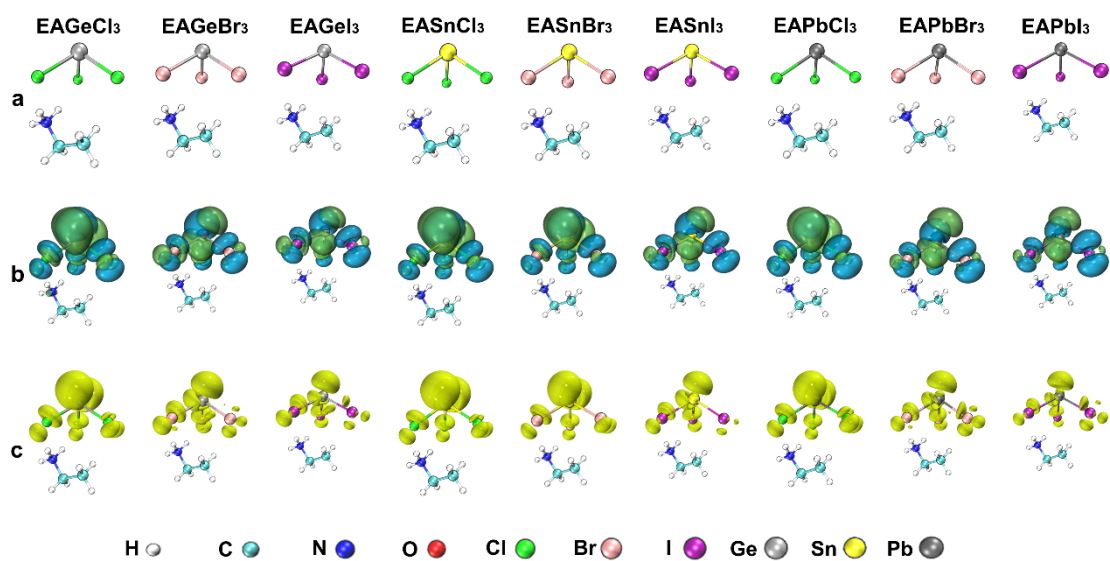

Figure S3. a) Optimized structures of EABX<sub>3</sub> (B = Ge<sup>2+</sup>, Sn<sup>2+</sup>, Pb<sup>2+</sup>, and X = Cl<sup>-</sup>, Br<sup>-</sup>, I<sup>-</sup>). b) The electron-hole distribution chart. Green and blue isosurfaces represent the distribution of electrons and holes, respectively. c) The  $\rho(r)$  distribution charts. The yellow isosurface represents the overlap of electrons and holes. The isosurfaces were uniformly selected as 0.002, respectively.



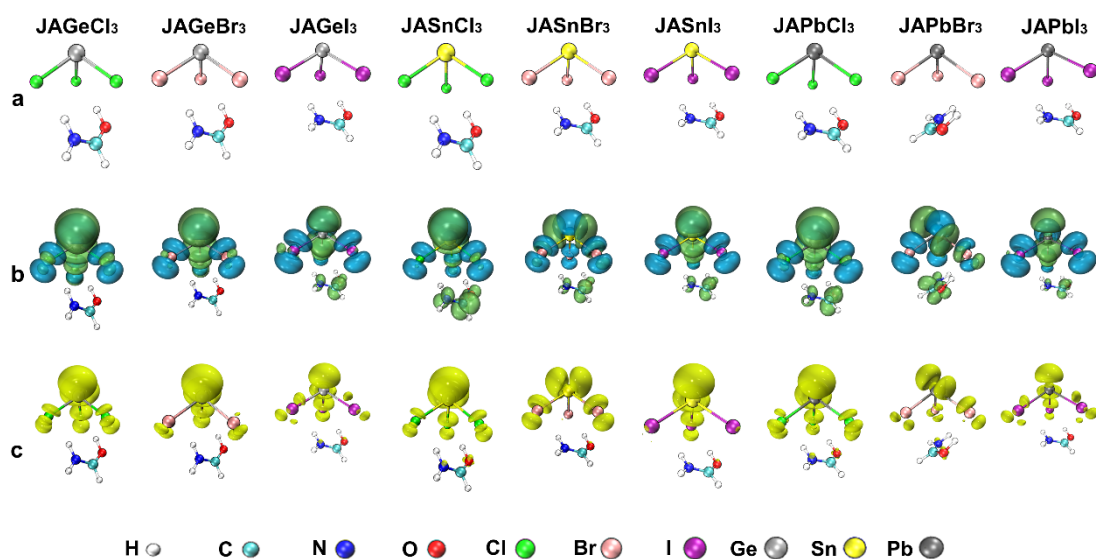

Figure S4. a) Optimized structures of JABX<sub>3</sub> (B = Ge<sup>2+</sup>, Sn<sup>2+</sup>, Pb<sup>2+</sup>, and X = Cl<sup>-</sup>, Br<sup>-</sup>, I<sup>-</sup>). b) The electron-hole distribution chart. Green and blue isosurfaces represent the distribution of electrons and holes, respectively. c) The  $s(r)$  distribution charts. The yellow isosurface represents the overlap of electrons and holes. The isosurfaces were uniformly selected as 0.002, respectively.

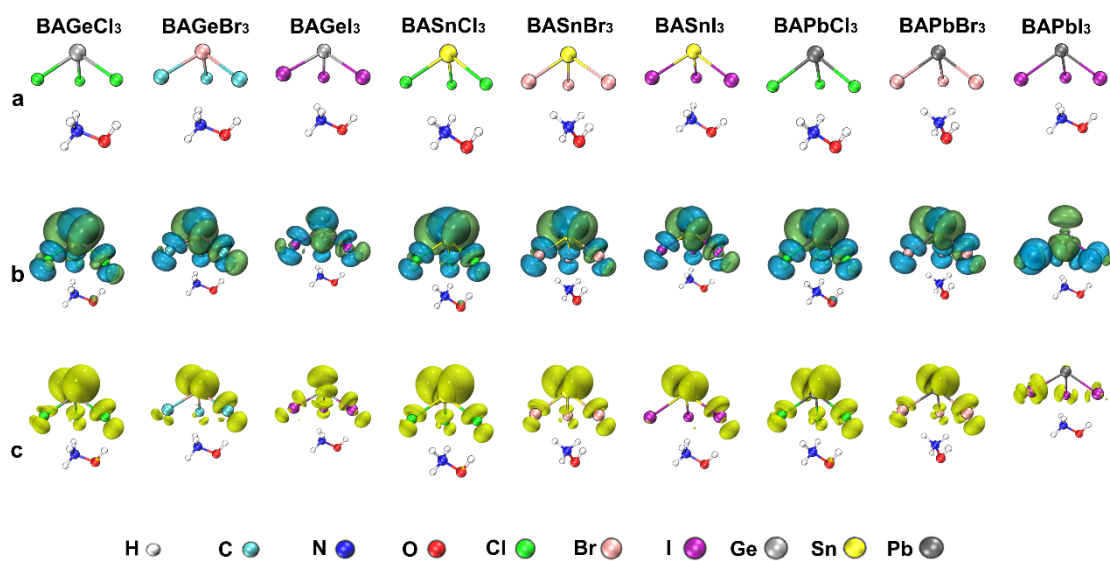

Figure S5. a) Optimized structures of BABX<sub>3</sub> (B = Ge<sup>2+</sup>, Sn<sup>2+</sup>, Pb<sup>2+</sup>, and X = Cl<sup>-</sup>, Br<sup>-</sup>, I<sup>-</sup>). b) The electron-hole distribution chart. Green and blue isosurfaces represent the distribution of electrons and holes, respectively. c) The  $\rho(r)$  distribution charts. The yellow isosurface represents the overlap of electrons and holes. The isosurfaces were uniformly selected as 0.002, respectively.

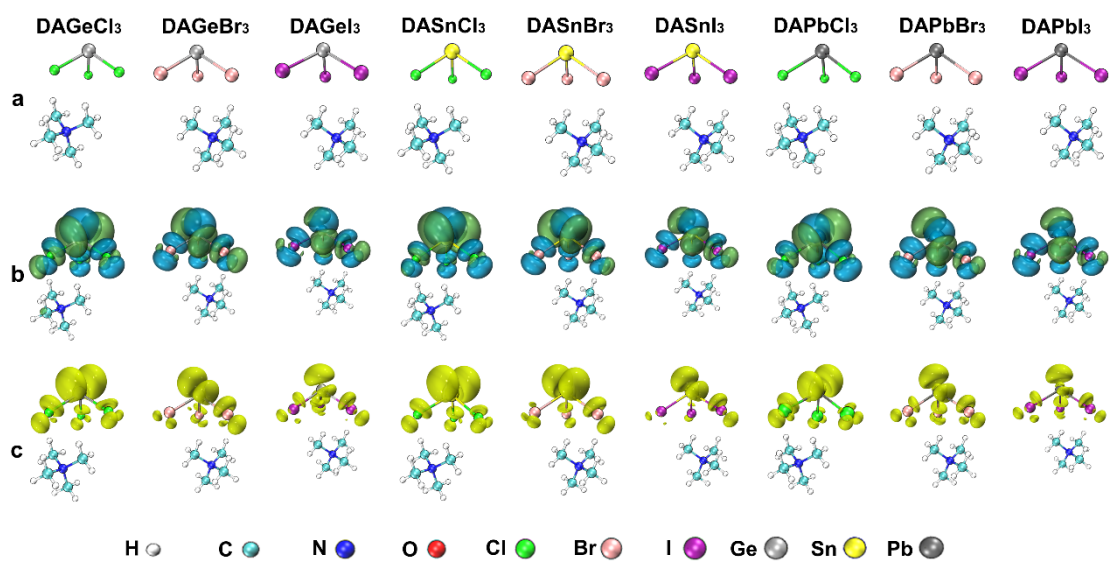

Figure S6. a) Optimized structures of DABX<sub>3</sub> (B = Ge<sup>2+</sup>, Sn<sup>2+</sup>, Pb<sup>2+</sup>, and X = Cl<sup>-</sup>, Br<sup>-</sup>, I<sup>-</sup>). b) The electron-hole distribution chart. Green and blue isosurfaces represent the distribution of electrons and holes, respectively. c) The  $\mathcal{S}(r)$  distribution charts. The yellow isosurface represents the overlap of electrons and holes. The isosurfaces were uniformly selected as 0.002, respectively.

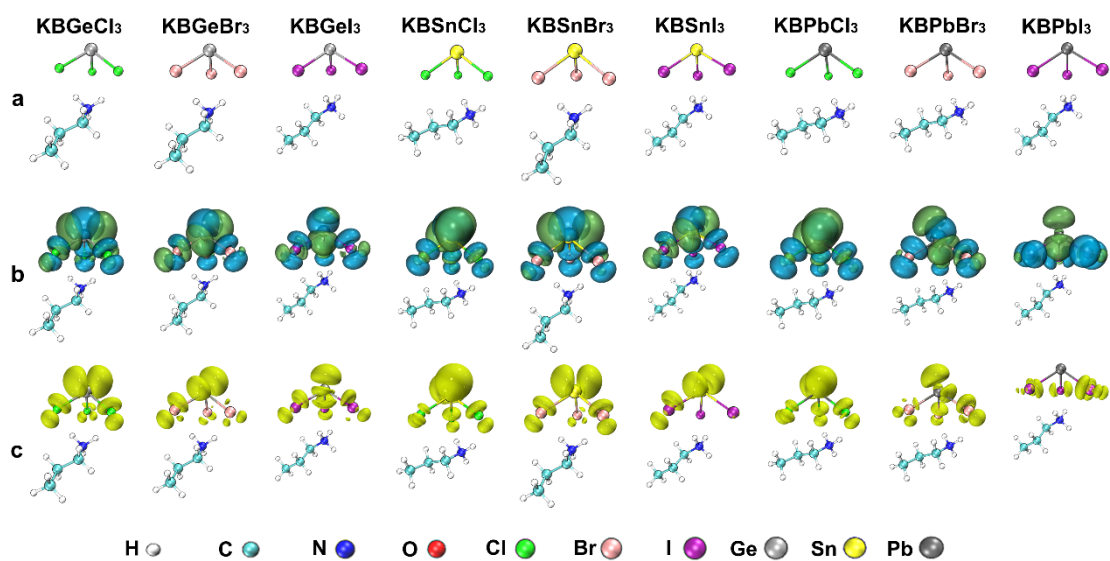

Figure S7. a) Optimized structures of  $\text{KBX}_3$  ( $\text{B} = \text{Ge}^{2+}$ ,  $\text{Sn}^{2+}$ ,  $\text{Pb}^{2+}$ , and  $\text{X} = \text{Cl}^-$ ,  $\text{Br}^-$ ,  $\text{I}^-$ ). b) The electron-hole distribution chart. Green and blue isosurfaces represent the distribution of electrons and holes, respectively. c) The  $\mathcal{S}(r)$  distribution charts. The yellow isosurface represents the overlap of electrons and holes. The isosurfaces were uniformly selected as 0.002, respectively.

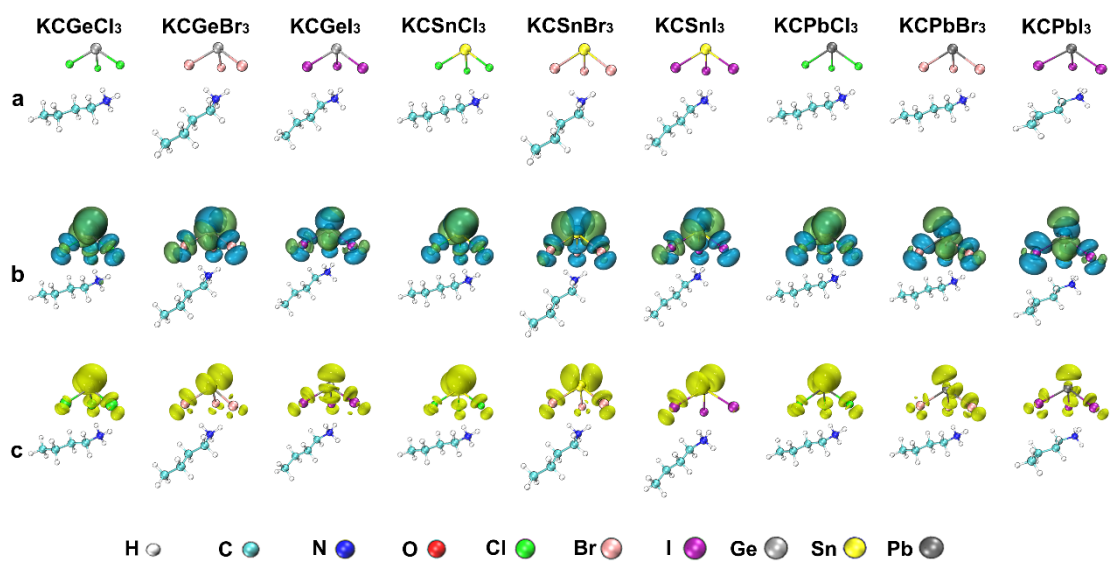

Figure S8. a) Optimized structures of  $\text{KCBX}_3$  ( $\text{B} = \text{Ge}^{2+}$ ,  $\text{Sn}^{2+}$ ,  $\text{Pb}^{2+}$ , and  $\text{X} = \text{Cl}^-$ ,  $\text{Br}^-$ ,  $\text{I}^-$ ). b) The electron-hole distribution chart. Green and blue isosurfaces represent the distribution of electrons and holes, respectively. c) The  $s(r)$  distribution charts. The yellow isosurface represents the overlap of electrons and holes. The isosurfaces were uniformly selected as 0.002, respectively.

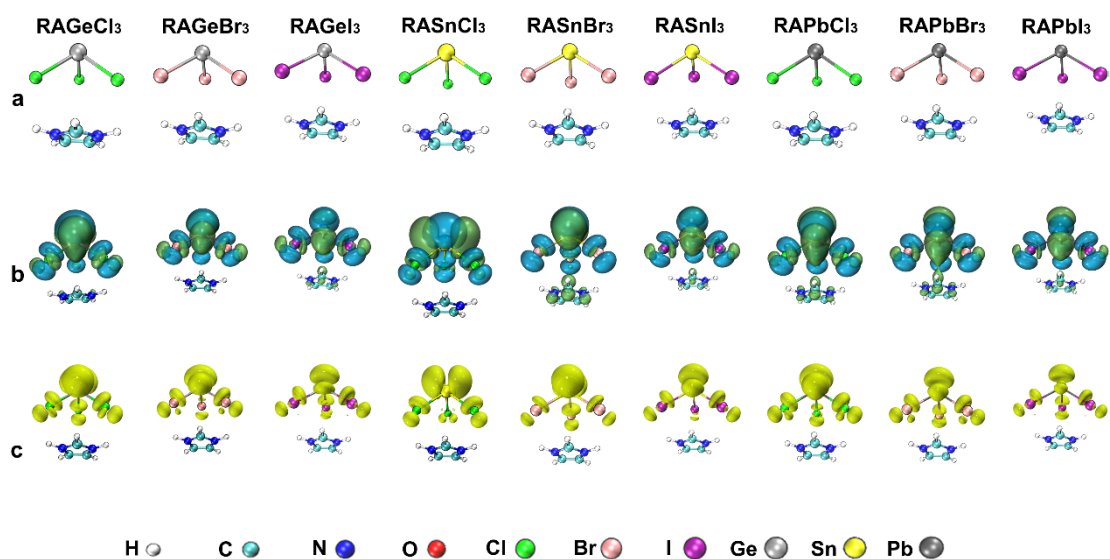

Figure S9. a) Optimized structures of  $RABX_3$  ( $B = \text{Ge}^{2+}, \text{Sn}^{2+}, \text{Pb}^{2+}$ , and  $X = \text{Cl}^-, \text{Br}^-, \text{I}^-$ ). b) The electron-hole distribution chart. Green and blue isosurfaces represent the distribution of electrons and holes, respectively. c) The  $s(r)$  distribution charts. The yellow isosurface represents the overlap of electrons and holes. The isosurfaces were uniformly selected as 0.002, respectively.

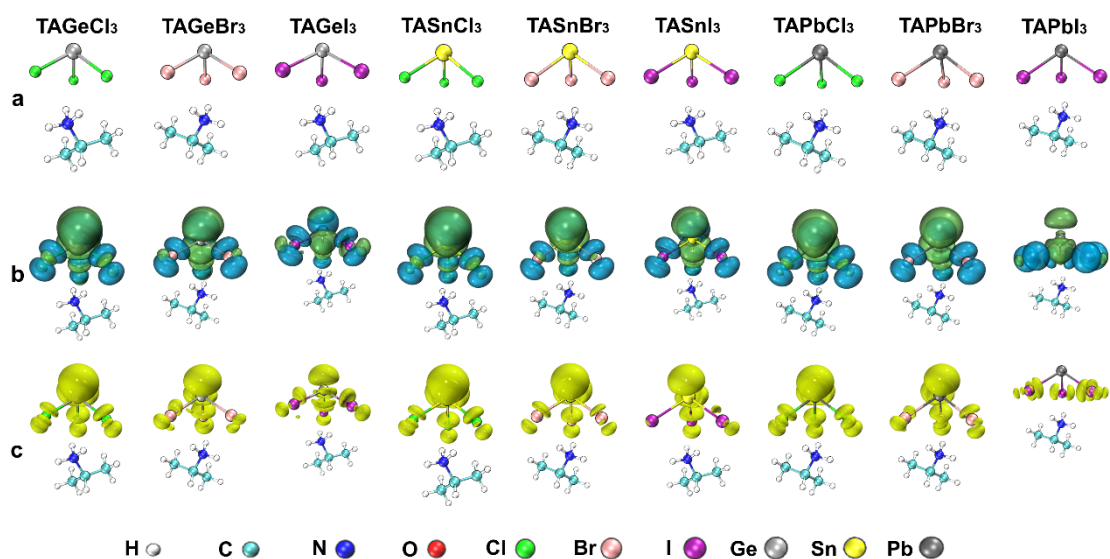

Figure S10. a) Optimized structures of TABX<sub>3</sub> (B = Ge<sup>2+</sup>, Sn<sup>2+</sup>, Pb<sup>2+</sup>, and X = Cl<sup>-</sup>, Br<sup>-</sup>, I<sup>-</sup>). b) The electron-hole distribution chart. Green and blue isosurfaces represent the distribution of electrons and holes, respectively. c) The  $s(r)$  distribution charts. The yellow isosurface represents the overlap of electrons and holes. The isosurfaces were uniformly selected as 0.002, respectively.

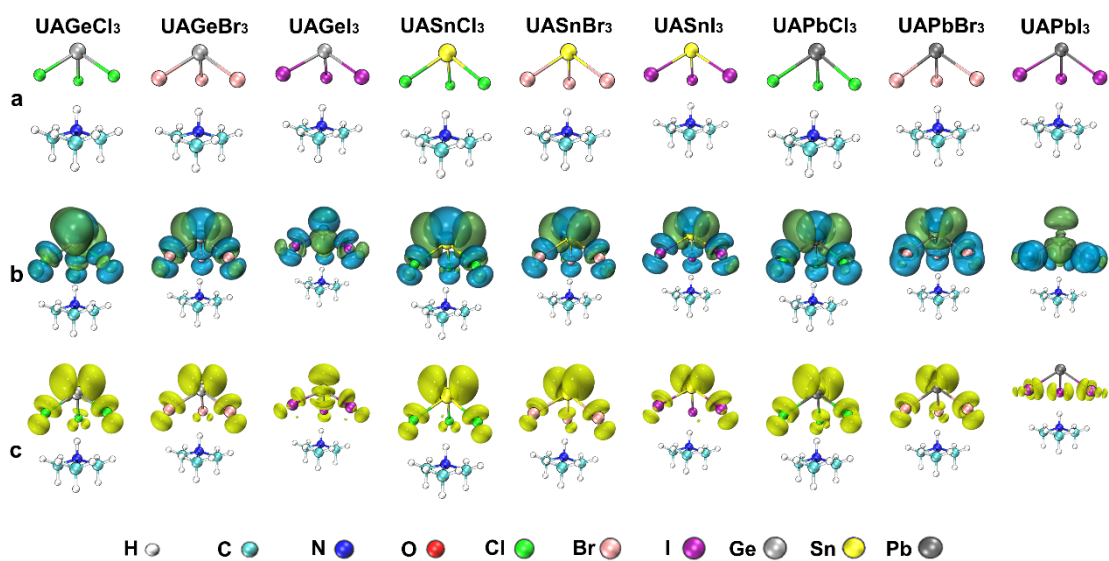

Figure S11. a) Optimized structures of  $UABX_3$  ( $B = \text{Ge}^{2+}, \text{Sn}^{2+}, \text{Pb}^{2+}$ , and  $X = \text{Cl}^-, \text{Br}^-, \text{I}^-$ ). b) The electron-hole distribution chart. Green and blue isosurfaces represent the distribution of electrons and holes, respectively. c) The  $\mathcal{S}(r)$  distribution charts. The yellow isosurface represents the overlap of electrons and holes. The isosurfaces were uniformly selected as 0.002, respectively.



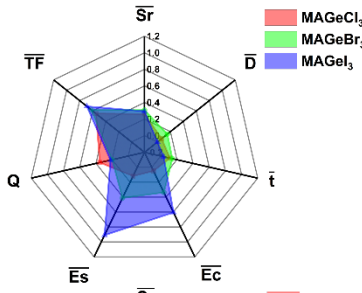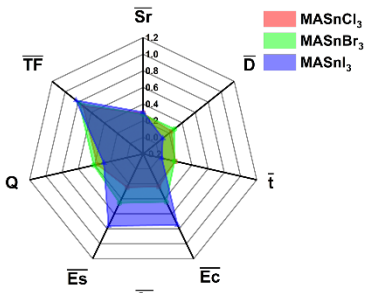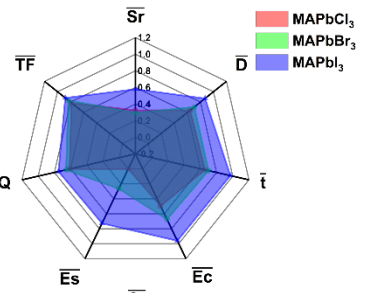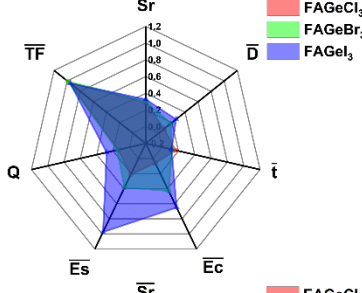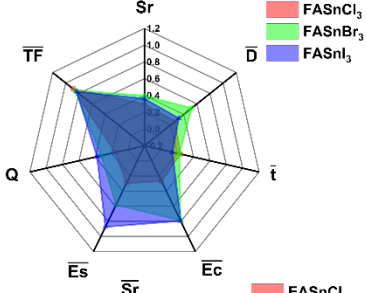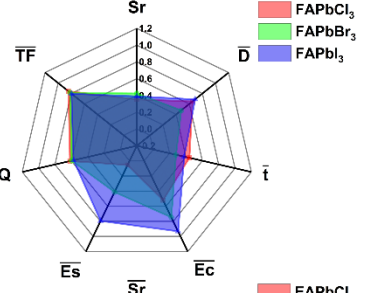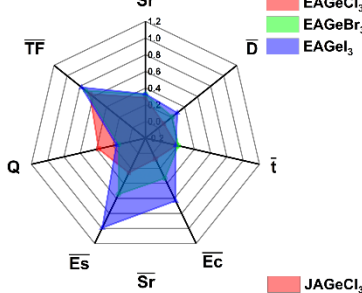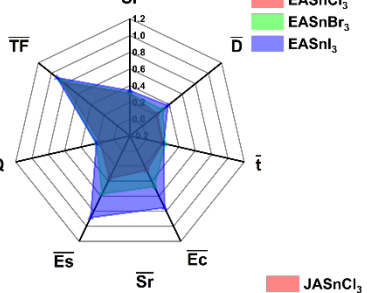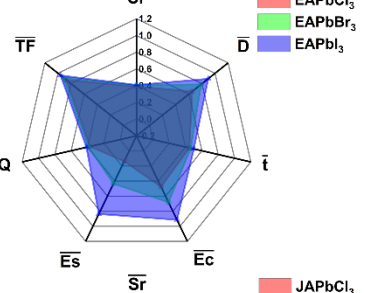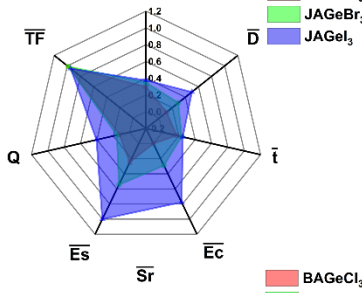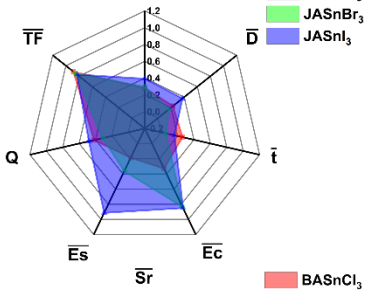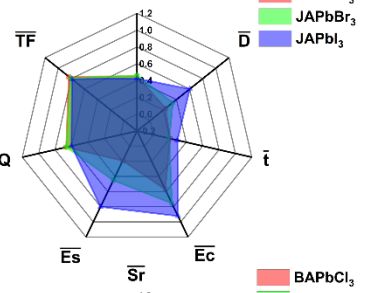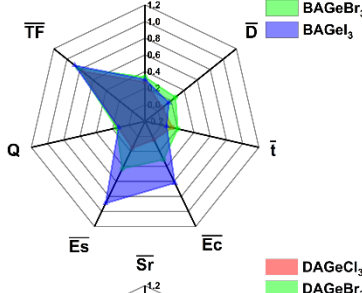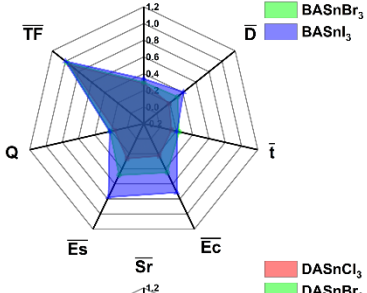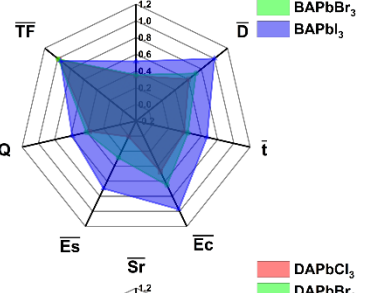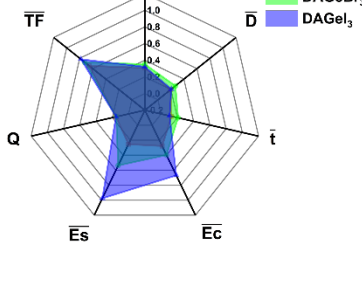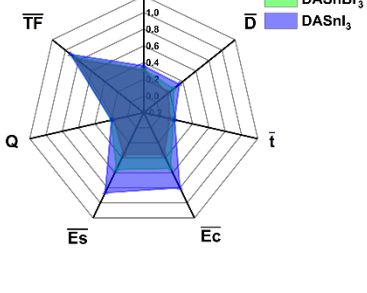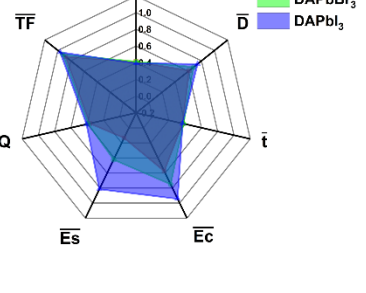

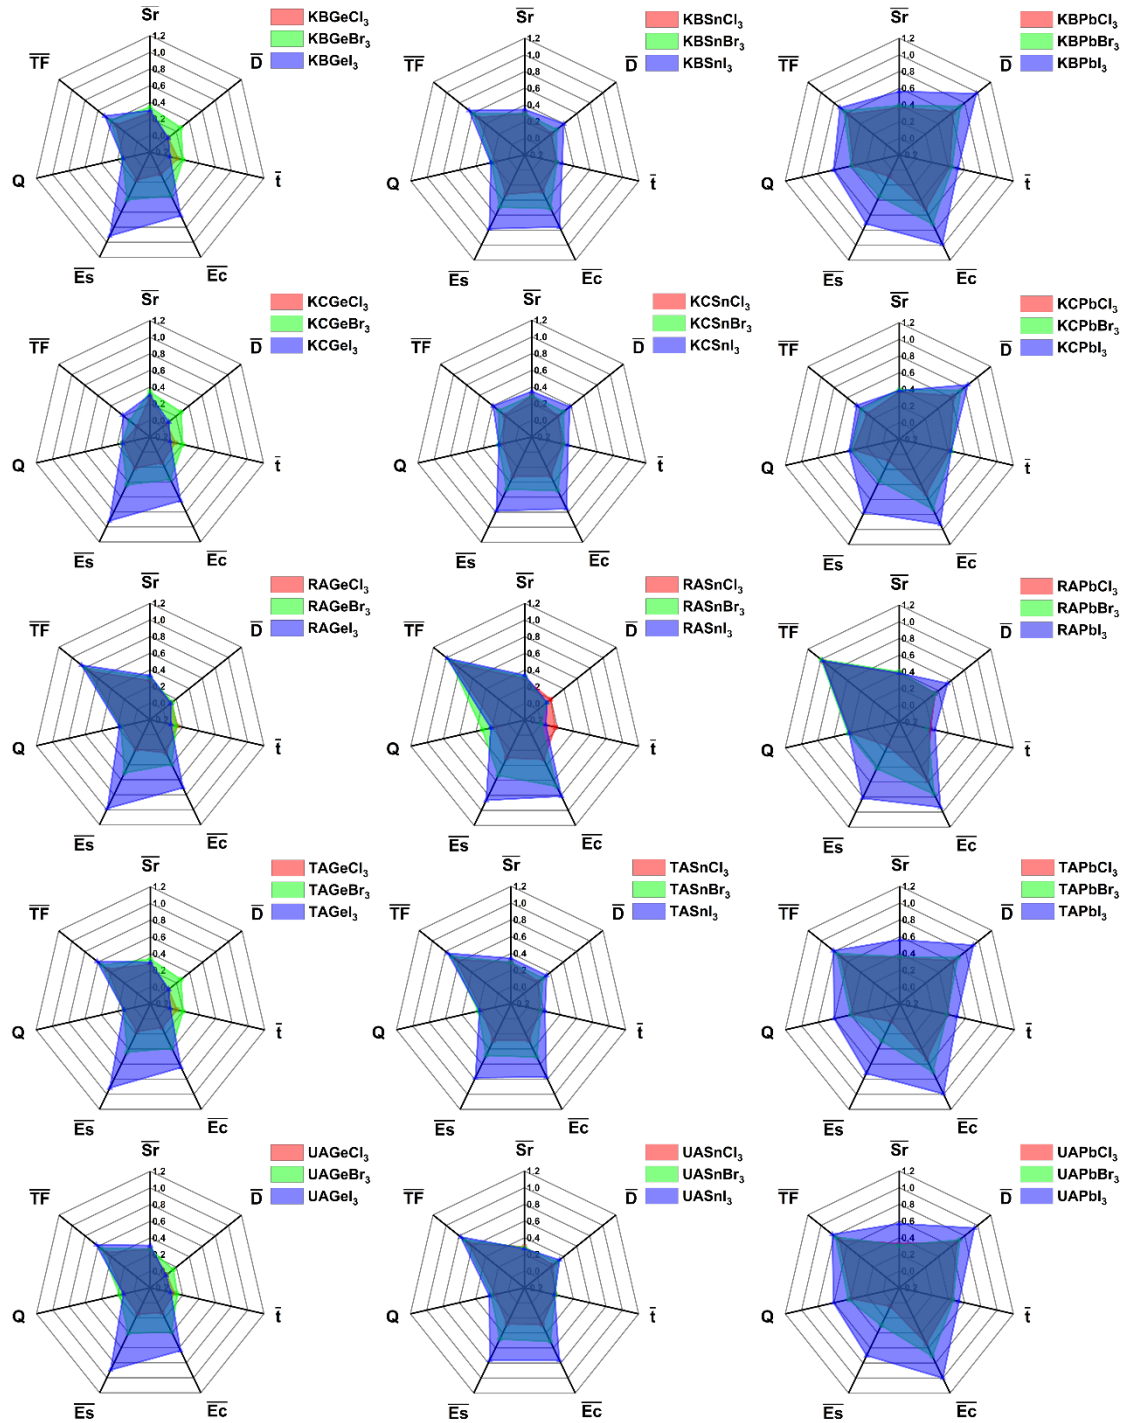

Figure S12. Radar chart of the normalized electronic excitation characteristic index.  $\bar{D}$  index means the centroid distance between holes and electrons.  $\bar{S}r$  index means the separation between holes and electrons.  $\overline{TF}$  means the normalized tolerance factor. The  $Q$  index represents the net charge transfer.  $\bar{E}c$  and  $\bar{E}s$  respectively represent the relative magnitude of exciton binding energy and excitation energy.  $\bar{t}$  index measures the degree of separation of holes and electrons.

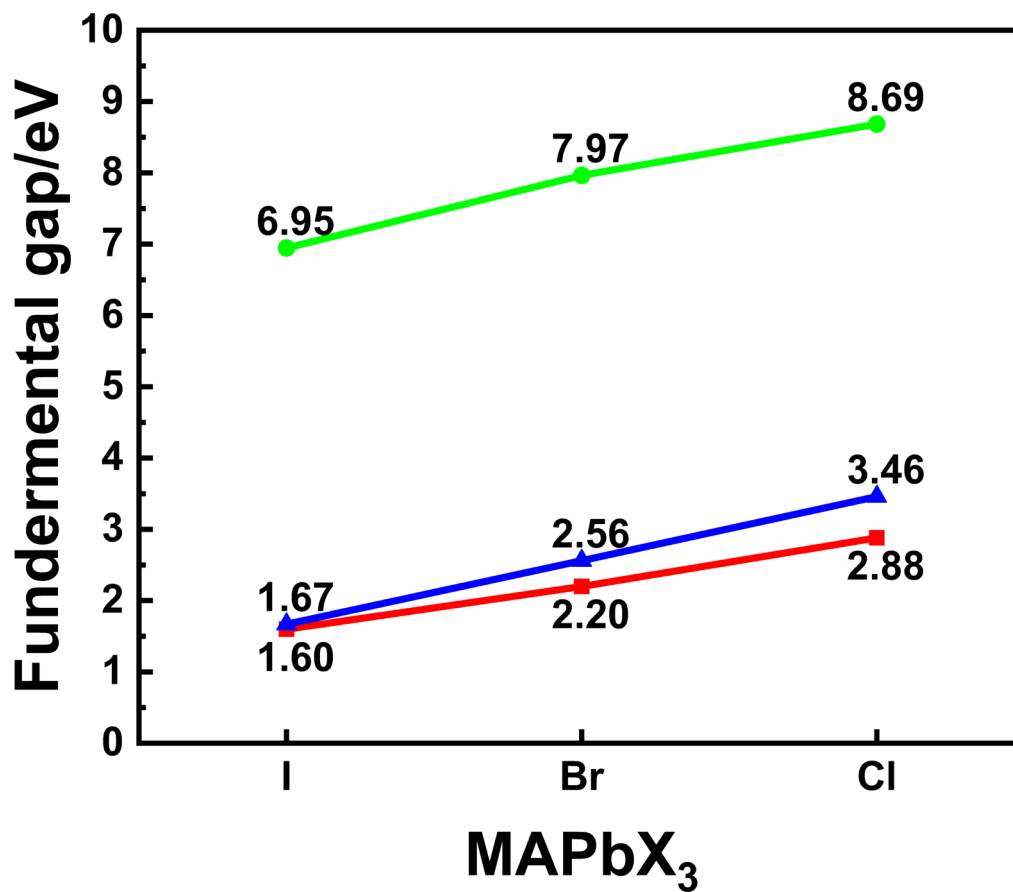

Figure S13. The DFT-M06-2X calculated HOMO-LUMO gaps (green) of the molecules compared to band gaps (blue) calculated by the DFT-GGA-GW with SOC and the experimental values (red).

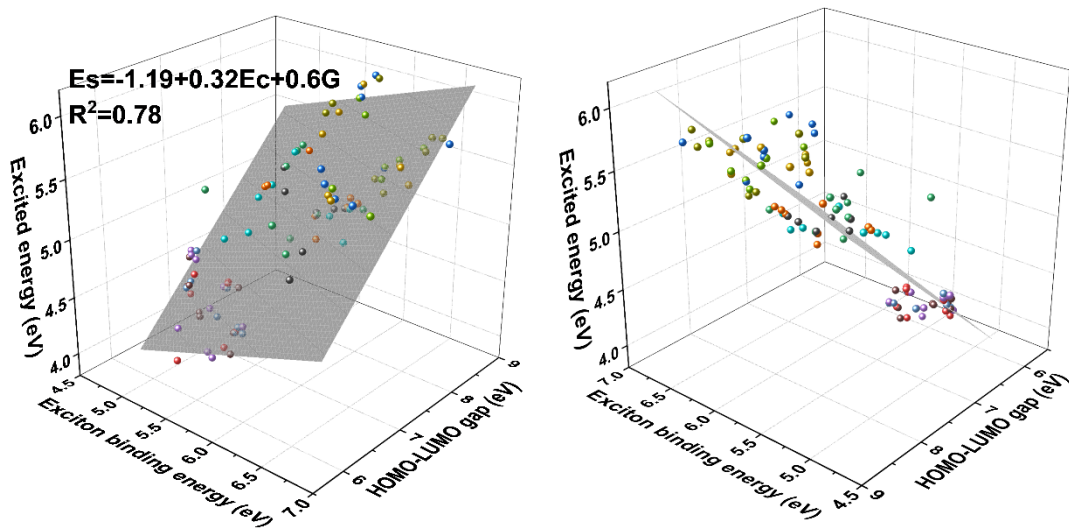

Figure S14 Two-dimensional plane fitting diagram between exciton binding energy, HOMO-LUMO gap, and excitation energy.  $E_s$  means the excited energy.  $E_c$  means the exciton binding energy and  $G$  represents the HOMO-LUMO gap.

## Notes and references

1. A. M. Glazer, *Acta Crystallogr. Sect. B*, 1972, **28**, 3384–3392.
2. Markus B., Thorsten K., Michael W., *Dalton Trans.*, 2017, **46**, 3500-3509.
3. Shannon R D., *Acta Crystallogr. Sect. A*, 1976, **32**, 751-767.
4. A. Amat, E. Mosconi, E. Ronca, C. Quarti, P. Umari, Md. K. Nazeeruddin, M. Grätzel, F. De Angelis, *Nano lett.*, 2014, **14**, 3608-3616.
5. T. J. Jacobsson, M. Pazoki, A. Hagfeldt, T. Edvinsson, *J. Phys. Chem. C*, 2015, **119**, 25673-25683.
6. I. E. Collings, J. A. Hill, A. B.Cairns, R. I. Cooper, A. L. Thompson, J. E. Parker, C. C. Tang, A. L. Goodwin, *Dalton Trans.*, 2016, **45**, 4169-4178.
